# Supplementary material for: No evidence that footedness in pheasants influences cognitive performance in tasks assessing colour discrimination and spatial ability
Source: Learn Behav. 2020 Jan 8;48(1):84–95. doi: 10.3758/s13420-019-00402-8 (PMC7082386; doi:10.3758/s13420-019-00402-8)
Supplement: Supplementary file 1 — (XLSX 24 kb) [file 13420_2019_402_MOESM1_ESM.xlsx]

## Sheet: Spatial
Bird	Sex	Degree	Left.Right.B1	Left.Right.X.first	Left.Right.X.50	Top.Bottom.B1	Top.Bottom.X.first	Top.Bottom.X.50	Local_Spatial.B1	Local_Spatial.X.01	Local_Spatial.X.18
481	F	1	0.0215735	0.515073	0.753509	0.053006	0.146675	0.6977	-0.0508167	4.38131	1.84682
482	F	0	0.00775261	0.702458	0.775374	0.00611802	0.543268	0.616162	-0.0163479	4.19816	3.17953
483	F	0.333333	0.038581	0.490746	0.864531	0.0154193	0.128991	0.239693	-0.0309563	5.42288	3.2039
484	F	0	0.043514	0.43958	0.868678	0.0558804	0.269744	0.850968	0.00492894	2.60967	2.83777
485	M	0	-0.0100143	0.813821	0.727966	-0.0193211	0.672425	0.443355	-0.0577781	3.12593	1.17059
486	F	0.5	0.0390553	0.313458	0.755785	0.0539922	0.22601	0.804497	-0.0797358	6.63858	1.71153
488	F	1	0.0503772	0.276441	0.818512	-0.0166543	0.711871	0.522093	0.0917663	1.30396	6.20551
489	M	1	-0.0248598	0.871072	0.666487	0.0506117	0.379014	0.879344	-0.0313734	3.57911	2.09964
490	F	0.466667	0.0274432	0.437495	0.749018	0.0289669	0.329668	0.670332	0.0157391	1.88905	2.46857
491	F	0.142857	-0.0189614	0.652009	0.425257	0.0417764	0.125425	0.526229	0.0445019	2.00138	4.26468
493	M	0.333333	0.00574375	0.648918	0.710071	0.0181229	0.471086	0.684005	-0.0787871	7.5979	1.99071
494	M	0	0.0393075	0.567499	0.900045	0.10434	0.0217127	0.786634	0.0272584	2.26867	3.60596
496	F	0.0909091	0.0148871	0.490432	0.666232	0.0114832	0.661314	0.774139	-0.110944	5.58922	0.847711
497	F	0.5	0.0347713	0.355301	0.751752	0.101234	0.163108	0.965283	0.0144823	3.76248	4.81279
498	F	0	0.0570788	0.451165	0.930919	0.0242873	0.545051	0.797505	-0.0315057	3.28987	1.92563
499	M	0.2	0.0773397	0.130695	0.869305	0.0143151	0.692754	0.819722	-0.0388957	3.9401	2.03395
500	F	0.333333	0.0399527	0.290644	0.743726	0.0395093	0.258377	0.707141	-0.0386535	2.99138	1.55058
502	F	0.2	0.0288084	0.34925	0.687676	0.0328281	0.573175	0.870275	-0.0807711	5.196	1.31624
503	F	1	0.037737	0.383165	0.797861	0.0375025	0.697822	0.935509	-0.0114451	3.28249	2.70211
505	M	0.0666667	-0.0432721	0.789892	0.31087	-0.0241552	0.932766	0.809438	-0.0287602	3.51895	2.15813
506	F	0.375	-0.000476385	0.722349	0.717643	0.0479442	0.392532	0.871309	0.011153	2.27008	2.744
507	M	0.0666667	0.00180093	0.79288	0.806998	-0.0152899	0.511984	0.331533	-0.0448227	4.90798	2.29074
508	M	0.2	-0.0277561	0.782051	0.479414	-0.0246214	0.587717	0.299032	-0.031975	4.24283	2.46368
509	F	0.2	0.0571554	0.303243	0.877473	0.0521768	0.535076	0.936861	-0.0612577	3.82485	1.35005
510	M	0.466667	-0.0201629	0.694981	0.458974	0.0133169	0.606862	0.747754	-0.0274286	3.54129	2.22155
511	M	0	0.0975915	0.141255	0.951528	-0.01044	0.462085	0.339951	-0.0233731	3.69985	2.48668
513	F	0.6	0.0051003	0.59466	0.65321	-0.0177645	0.56765	0.354757	-0.0248505	2.04165	1.33816
515	F	0.0909091	-0.0122914	0.794888	0.679694	0.0213869	0.657758	0.845701	0.00969668	2.35039	2.7716
516	M	0.333333	-0.034441	0.699266	0.300734	0.0345009	0.564466	0.87543	-0.117094	6.28918	0.859182
519	M	0.0769231	-0.0124198	0.743422	0.611888	0.0327526	0.451114	0.803562	-0.0303359	3.4087	2.03525
520	F	0.25	0.0345057	0.221445	0.606712	0.0390746	0.184763	0.605933	-0.0663386	4.14388	1.34162
521	M	0.0909091	0.0344169	0.464814	0.824256	0.0336692	0.381436	0.762481	-0.0295506	3.38815	2.05017
522	M	0.714286	0.00139926	0.774081	0.785845	0.0549531	0.0655933	0.509065	-0.0378054	3.83296	2.01566
523	M	0.0909091	-0.0131527	0.599409	0.439922	0.033407	0.518665	0.847049	-0.0816857	5.22512	1.3032
524	M	0	0.0287847	0.388458	0.722451	0.0372913	0.322594	0.747514	-0.0255242	4.44695	2.88149
528	F	0.5	0.0837015	0.434462	0.978911	0.0524342	0.636612	0.958112	-0.0108428	2.9195	2.42804
634	M	0.5	0.019851	0.48183	0.710947	-0.0446621	0.795727	0.303932	-0.00675653	3.88102	3.45989
636	M	0.263158	-0.000985646	0.585875	0.57411	-0.0164739	0.762697	0.589114	-0.0462524	4.15949	1.89477
637	M	0.0588235	-0.00320232	0.618724	0.581083	0.0259714	0.489647	0.774025	0.0408949	2.53266	5.07579
638	F	0.222222	0.00721599	0.770786	0.827261	-0.0122129	0.877394	0.797307	-0.0170216	3.00586	2.2506
641	F	0.142857	0.00500591	0.489377	0.550525	-0.0270281	0.902622	0.711428	-0.00213171	3.45064	3.32783
642	F	0.2	-0.0425704	0.898211	0.522872	0.0225835	0.404024	0.672136	0.00780982	3.58418	4.09308
643	M	0.111111	0.0540783	0.33918	0.878989	0.0178363	0.581434	0.768994	-0.0362461	4.75399	2.56716
644	M	0.5	0.0197537	0.461397	0.692794	-0.00524498	0.745399	0.693646	-0.0374141	5.05472	2.67589
650	F	0.142857	-0.0043473	0.722038	0.67734	0.0231169	0.6239	0.83738	-0.0315878	5.80768	3.39461
651	M	0	0.0224336	0.365952	0.634048	0.0928806	0.635671	0.993987	-0.0304232	3.83736	2.2878
652	M	0.142857	0.0408175	0.363437	0.80839	0.00200105	0.588198	0.611726	-0.0167436	2.55246	1.92018
655	F	0.333333	0.0599651	0.409319	0.929005	0.0589325	0.537335	0.954232	0.0141552	3.29138	4.18683
656	F	0.6	0.0191757	0.507224	0.724821	0.0614697	0.526182	0.957582	0.00437349	3.16761	3.4121
658	M	0.230769	0.0183328	0.279474	0.487812	0.0717106	0.241304	0.914376	0.0165363	3.46273	4.58677
660	F	0	-0.00120053	0.607045	0.592928	0.0318876	0.526947	0.841627	-0.00915345	4.01886	3.43972
662	M	0.333333	0.0217728	0.606499	0.817498	0.0561392	0.351901	0.894743	0.0462885	1.49343	3.28045
666	F	0.2	-0.0322745	0.868536	0.576062	0.0145949	0.451289	0.627075	0.0347227	1.99398	3.59814
667	F	0.142857	0.00560781	0.566781	0.632629	0.0320042	0.551492	0.855067	0.0163705	2.40824	3.181
669	F	0.157895	0.018748	0.576291	0.773156	0.041157	0.558253	0.904717	0.0335297	2.7984	4.94835
670	M	0.5	0.0180439	0.391246	0.608754	-0.00162682	0.825833	0.814069	-0.0225783	4.41208	3.00572
671	M	0.0909091	-0.0339394	0.8224	0.467462	0.016176	0.441816	0.636181	0.0068207	4.13908	4.64795
672	M	0.25	0.0132415	0.697988	0.815563	0.00285906	0.705741	0.733975	0.0149532	2.75873	3.55721
673	M	0.714286	0.0201608	0.236726	0.454418	-0.00295766	0.597578	0.562289	-0.0259681	4.74033	3.0485
674	M	0.555556	0.0205	0.637519	0.827657	0.0384475	0.517247	0.875767	-0.0332863	4.64865	2.63982
677	M	0	0.000441356	0.677644	0.68235	0.0363416	0.454199	0.831602	-0.0158454	3.42096	2.61313
679	F	0.2	-0.0173705	0.697897	0.496538	0.0832845	0.337468	0.967902	-0.0362607	6.01743	3.24861
680	F	0	-0.0215172	0.71955	0.472001	-0.0134296	0.926982	0.867976	0.021245	2.81361	4.03753
682	F	1	-0.00600926	0.634934	0.564388	0.0533677	0.389275	0.89703	-0.0218628	4.58662	3.16286
683	M	0.0769231	0.0231946	0.462157	0.728074	0.0070976	0.599394	0.679336	-0.0141835	3.68776	2.89765
685	M	0.0666667	0.0472848	0.351061	0.845871	0.03847	0.630502	0.918295	-0.0139019	3.73869	2.95176
700	M	0.25	0.0443644	0.513756	0.902814	0.0222186	0.446852	0.705849	-0.0146405	2.94862	2.29894
708	F	0.5	-0.0889454	0.945382	0.181367	0.0368797	0.579687	0.893651	-0.0482784	4.04063	1.77832
730	F	0.5	-0.0257336	0.740704	0.447367	0.0395093	0.292859	0.741623	-0.000379099	2.731	2.71346

## Sheet: Colour
Bird	Sex	Degree	Blu.Grn.X.first	Blu.Grn.X.50	Yell.Pink.X.first	Yell.Pink.X.50	Green-Orange.X.first	DarkGreen-Orange.X.50
530	F	0	0.359533	0.713685	0.737764	0.410475	0.471074	0.370024
532	M	0.25	0.634934	0.564388	0.715147	0.684562	0.451786	0.428258
537	F	0.5	0.563768	0.674198	0.58789	0.41211	0.470593	0.489416
538	M	0.111111	0.489377	0.550525	0.522093	0.711871	0.435443	0.524766
539	M	0	0.72582	0.631787	0.376627	0.423674	0.508145	0.571643
540	M	0.428571	0.343496	0.579467	0.5176	0.562295	0.416763	0.583237
541	M	0.75	0.363665	0.636335	0.376307	0.880925	0.674644	0.440962
543	M	0.333333	0.314446	0.844701	0.432949	0.447067	0.381515	0.656474
544	M	0.333333	0.488794	0.629623	0.462164	0.826104	0.458974	0.694981
548	F	0.2	0.522347	0.477653	0.472877	0.566891	0.262177	0.770637
549	M	0.4	0.509466	0.791675	0.273378	0.873231	0.240714	0.574854
550	F	0.176471	0.506431	0.374949	0.224387	0.469816	0.49422	0.426025
551	M	0.2	0.447133	0.552867	0.437002	0.916989	0.436074	0.545906
553	F	1	0.391104	0.754327	0.617829	0.42115	0.437779	0.522409
555	M	0.333333	0.374194	0.768538	0.43041	0.818672	0.328745	0.707381
558	M	0.5	0.526947	0.97168	0.579687	0.893651	0.407531	0.553025
561	F	0	0.518505	0.678014	0.489412	0.510588	0.553234	0.757013
563	M	0.2	0.472619	0.606436	0.645948	0.512124	0.3096	0.820637
565	M	0.142857	0.437047	0.782571	0.611533	0.548035	0.475234	0.564557
568	F	0.5	0.614106	0.625871	0.565949	0.781392	0.576326	0.623373
569	M	0	0.585512	0.454034	0.542748	0.655517	0.489377	0.550525
570	F	0.5	0.390836	0.720322	0.354885	0.717975	0.399317	0.676573
571	F	0.538462	0.406421	0.850376	0.458824	0.461177	0.39303	0.785303
572	M	0.2	0.486224	0.83922	0.677644	0.68235	0.487291	0.741786
573	M	0.5	0.228562	0.880727	0.541148	0.498805	0.359348	0.602215
574	F	0.0588235	0.679585	0.475927	0.665137	0.573463	0.719748	0.679754
576	M	0.2	0.358642	0.840621	0.237519	0.618564	0.428421	0.571579
578	F	0	0.480765	0.67515	0.428441	0.371992	0.447133	0.552867
579	F	0	0.462451	0.381765	0.319192	0.812904	0.570035	0.743017
582	M	0.428571	0.456148	0.858569	0.562704	0.847855	0.108039	0.755142
584	F	0	0.440962	0.674644	0.540882	0.618472	0.417058	0.696621
585	M	0.428571	0.45217	0.77059	0.512874	0.566972	0.290387	0.597258
586	F	0	0.368852	0.705054	0.484663	0.555207	0.562231	0.437769
588	M	0.142857	0.386081	0.724575	0.646487	0.712341	0.287573	0.712427
589	M	0.0588235	0.703225	0.656177	0.484284	0.708784	0.423493	0.615534
590	M	0.333333	0.45217	0.77059	0.261667	0.738333	0.435366	0.484763
591	M	0.333333	0.248743	0.813177	0.621176	0.618823	0.450532	0.665748
592	M	0.2	0.722676	0.509707	0.529407	0.510584	0.416467	0.622413
593	F	0.272727	0.414387	0.506056	0.634251	0.72359	0.467878	0.611039
594	M	0.142857	0.24011	0.691094	0.458824	0.461177	0.266836	0.698245
595	F	0	0.418808	0.620122	0.609375	0.63055	0.427616	0.757243
597	M	1	0.459694	0.730192	0.456512	0.423575	0.351541	0.685469
599	F	0.142857	0.383636	0.899992	0.708784	0.484284	0.681797	0.473507
600	M	0.1	0.538494	0.620779	0.326639	0.835891	0.474455	0.643266
602	M	0.6	0.555268	0.524683	0.489412	0.510588	0.501176	0.498824
604	F	0	0.487928	0.866229	0.626844	0.730261	0.508145	0.571643
605	M	0.5	0.525024	0.779671	0.496483	0.463546	0.252375	0.63998
607	F	1	0.467081	0.723822	0.563384	0.748573	0.684415	0.635016
609	M	0.4	0.469672	0.647788	0.449277	0.703684	0.409251	0.80393
610	M	0.2	0.601003	0.784257	0.332311	0.630054	0.454838	0.346755
611	M	0.428571	0.491734	0.548182	0.517145	0.716209	0.422895	0.654258
612	F	0.2	0.783766	8.18e-06	0.548437	0.489733	0.404926	0.47547
613	M	0.666667	0.656805	0.343195	0.409451	0.629271	0.306441	0.374643
614	F	0.111111	0.327179	0.74335	0.581176	0.578823	0.522353	0.517647
616	M	0.538462	0.654102	0.665866	0.407531	0.553025	0.402447	0.636107
618	F	1	0.402447	0.636107	0.472063	0.645529	0.623083	0.536105
620	F	0.2	0.458398	0.620217	0.421422	0.578578	0.421835	0.692257
621	M	0.333333	0.501646	0.797581	0.744644	0.812874	0.460103	0.656795
624	M	0.2	0.479236	0.63873	0.377418	0.622582	0.421459	0.538903
626	F	0.25	0.722249	0.350246	0.690069	0.424224	0.606655	0.512641
627	M	0.142857	0.564557	0.475234	0.427448	0.723004	0.512124	0.645948
629	M	0.666667	0.494751	0.769973	0.550525	0.489377	0.538802	0.501161
690	M	0.428571	0.383851	0.760451	0.615534	0.423493	0.441816	0.636181
711	M	0	0.69351	0.50143	0.591524	0.795437	0.470521	0.569224
722	F	1	0.513197	0.820743	0.431999	0.786513	0.741786	0.487291
727	M	0.142857	0.681797	0.473507	0.4824	0.437705	0.48706	0.51294
